# Supplementary material for: Increased Risk of Stillbirth among Women whose Partner Has Tuberculosis
Source: Hindawi journal article supplement (doi:10.1155/2021/1837881), 2021-01-01
Supplement: f1 [file 1837881.f1.pdf]

Table S1. Comparison of characteristics and pregnancy outcomes among couples with different condition of TB

| Variables                       | Women with TB                  |                       |                              |                       | Women without TB          |                       |                               |              |
|---------------------------------|--------------------------------|-----------------------|------------------------------|-----------------------|---------------------------|-----------------------|-------------------------------|--------------|
|                                 | Partner with TB<br>(55)        | <i>P</i> <sup>a</sup> | Partner without TB<br>(2859) | <i>P</i> <sup>b</sup> | Partner with TB<br>(3475) | <i>P</i> <sup>c</sup> | Partner without TB<br>(31945) |              |
| <b>Female's characteristics</b> |                                |                       |                              |                       |                           |                       |                               |              |
| Age (year)                      | 29.00 [27.00, 32.00]           | 0.068                 | 28.00 [26.00, 31.00]         | 0.167                 | 28.00 [25.00, 31.00]      | 0.177                 | 28.00 [25.00, 31.00]          |              |
| Ethnicity                       | Han                            | 42 (76.4)             | <0.001                       | 2564 (89.7)           | <0.001                    | 3146 (90.5)           | 0.002                         | 29398 (92.0) |
|                                 | Others                         | 13 (23.6)             |                              | 295 (10.3)            |                           | 329 (9.5)             |                               | 2547 (8.0)   |
| Education level                 | Junior high school and below   | 15 (27.3)             | 0.002                        | 957 (33.5)            | <0.001                    | 1092 (31.4)           | <0.001                        | 15471 (48.4) |
|                                 | High school and junior college | 32 (58.2)             |                              | 1620 (56.7)           |                           | 2059 (59.3)           |                               | 14926 (46.7) |
|                                 | Bachelor and above             | 8 (14.5)              |                              | 282 (9.9)             |                           | 324 (9.3)             |                               | 1548 (4.8)   |
| Intensity of work               | Light                          | 18 (32.7)             | 0.001                        | 983 (34.4)            | <0.001                    | 1179 (33.9)           | <0.001                        | 6515 (20.4)  |
|                                 | Moderate                       | 16 (29.1)             |                              | 623 (21.8)            |                           | 762 (21.9)            |                               | 4492 (14.1)  |
|                                 | Heavy                          | 21 (38.2)             |                              | 1253 (43.8)           |                           | 1534 (44.1)           |                               | 20938 (65.5) |
| Residence                       | Country                        | 38 (69.1)             | 0.062                        | 1947 (68.1)           | <0.001                    | 2354 (67.7)           | <0.001                        | 26348 (82.5) |
|                                 | City                           | 17 (30.9)             |                              | 912 (31.9)            |                           | 1121 (32.3)           |                               | 5597 (17.5)  |
| Menarche age                    | 14.00 [12.50, 15.00]           | 0.887                 | 13.00 [13.00, 14.00]         | 0.756                 | 13.00 [13.00, 14.00]      | 0.547                 | 14.00 [13.00, 14.00]          |              |
| Is regular of menstruas cycle   | No                             | 7 (12.7)              | 0.085                        | 281 (9.8)             | <0.001                    | 367 (10.6)            | <0.001                        | 1729 (5.4)   |
|                                 | Yes                            | 48 (87.3)             |                              | 2578 (90.2)           |                           | 3108 (89.4)           |                               | 30216 (94.6) |
| Menstrual blood volume          | Much                           | 3 (5.5)               | <0.001                       | 89 (3.1)              | <0.001                    | 117 (3.4)             | <0.001                        | 819 (2.6)    |
|                                 | Median                         | 43 (78.2)             |                              | 2459 (86.0)           |                           | 3035 (87.3)           |                               | 29815 (93.3) |
|                                 | Few                            | 9 (16.4)              |                              | 311 (10.9)            |                           | 323 (9.3)             |                               | 1311 (4.1)   |
| Dysmenorrhea                    | No                             | 26 (47.3)             | 0.003                        | 1538 (53.8)           | <0.001                    | 1964 (56.5)           | <0.001                        | 22068 (69.1) |
|                                 | Yes                            | 29 (52.7)             |                              | 1321 (46.2)           |                           | 1511 (43.5)           |                               | 9877 (30.9)  |
| Gravidity                       | 0                              | 18 (32.7)             | 0.067                        | 1177 (41.2)           | <0.001                    | 1528 (44.0)           | <0.001                        | 14970 (46.9) |
|                                 | 1                              | 22 (40.0)             |                              | 900 (31.5)            |                           | 1085 (31.2)           |                               | 11946 (37.4) |

|                             |          |                         |       |                         |        |                         |        |                         |
|-----------------------------|----------|-------------------------|-------|-------------------------|--------|-------------------------|--------|-------------------------|
| Parity                      | >= 2     | 15 (27.3)               |       | 782 (27.4)              |        | 862 (24.8)              |        | 5029 (15.7)             |
|                             | 0        | 33 (60.0)               | 0.449 | 1703 (59.6)             | <0.001 | 2051 (59.0)             | <0.001 | 16916 (53.0)            |
|                             | >= 1     | 22 (40.0)               |       | 1156 (40.4)             |        | 1424 (41.0)             |        | 15029 (47.0)            |
| Eat meat and eggs regularly | NO       | 0 (0.0)                 | 1     | 29 (1.0)                | 0.47   | 33 (0.9)                | 0.675  | 276 (0.9)               |
|                             | Yes      | 55 (100.0)              |       | 2830 (99.0)             |        | 3442 (99.1)             |        | 31669 (99.1)            |
| Anorexia vegetables         | NO       | 55 (100.0)              | 1     | 2848 (99.6)             | 0.223  | 3446 (99.2)             | 0.089  | 31759 (99.4)            |
|                             | Yes      | 0 (0.0)                 |       | 11 (0.4)                |        | 29 (0.8)                |        | 186 (0.6)               |
| Eat raw meat regularly      | NO       | 55 (100.0)              | 1     | 2834 (99.1)             | 0.002  | 3441 (99.0)             | <0.001 | 31806 (99.6)            |
|                             | Yes      | 0 (0.0)                 |       | 25 (0.9)                |        | 34 (1.0)                |        | 139 (0.4)               |
| Smoking                     | NO       | 55 (100.0)              | 1     | 2835 (99.2)             | <0.001 | 3445 (99.1)             | <0.001 | 31854 (99.7)            |
|                             | Yes      | 0 (0.0)                 |       | 24 (0.8)                |        | 30 (0.9)                |        | 91 (0.3)                |
| Passive smoking             | NO       | 37 (67.3)               | 0.001 | 2028 (70.9)             | <0.001 | 2531 (72.8)             | <0.001 | 27747 (86.9)            |
|                             | Yes      | 18 (32.7)               |       | 831 (29.1)              |        | 944 (27.2)              |        | 4198 (13.1)             |
| Drinking                    | NO       | 50 (90.9)               | 0.253 | 2584 (90.4)             | <0.001 | 3138 (90.3)             | <0.001 | 30697 (96.1)            |
|                             | Yes      | 5 (9.1)                 |       | 275 (9.6)               |        | 337 (9.7)               |        | 1248 (3.9)              |
| Pressure of life and work   | Never    | 33 (60.0)               | 0.001 | 1726 (60.4)             | <0.001 | 2068 (59.5)             | <0.001 | 24511 (76.7)            |
|                             | Mild     | 6 (10.9)                |       | 411 (14.4)              |        | 505 (14.5)              |        | 3994 (12.5)             |
|                             | Moderate | 13 (23.6)               |       | 629 (22.0)              |        | 788 (22.7)              |        | 3166 (9.9)              |
|                             | Severe   | 3 (5.5)                 |       | 93 (3.3)                |        | 114 (3.3)               |        | 274 (0.9)               |
| BMI (Kg/m <sup>2</sup> )    |          | 20.89 [19.29, 23.00]    | 0.6   | 20.32 [18.83, 22.26]    | <0.001 | 20.81 [19.14, 22.95]    | <0.001 | 20.57 [19.04, 22.67]    |
| SBP (mmHg)                  |          | 110.00 [101.50, 115.00] | 0.684 | 109.00 [100.00, 115.00] | 0.029  | 110.00 [101.00, 117.00] | 0.005  | 110.00 [100.00, 115.00] |
| DBP (mmHg)                  |          | 70.00 [66.50, 77.00]    | 0.435 | 70.00 [65.00, 76.00]    | 0.054  | 70.00 [65.00, 76.00]    | 0.581  | 70.00 [66.00, 75.00]    |
| Blood group                 | O        | 22 (40.0)               | 0.723 | 1040 (36.4)             | 0.007  | 1308 (37.6)             | <0.001 | 10736 (33.6)            |
|                             | A        | 16 (29.1)               |       | 803 (28.1)              |        | 988 (28.4)              |        | 9279 (29.0)             |
|                             | B        | 14 (25.5)               |       | 802 (28.1)              |        | 922 (26.5)              |        | 9122 (28.6)             |
|                             | AB       | 3 (5.5)                 |       | 214 (7.5)               |        | 257 (7.4)               |        | 2808 (8.8)              |
| Rh blood group              | Po       | 55 (100.0)              | 1     | 2852 (99.8)             | 0.611  | 3466 (99.7)             | 0.657  | 31843 (99.7)            |
|                             | Ne       | 0 (0.0)                 |       | 7 (0.2)                 |        | 9 (0.3)                 |        | 102 (0.3)               |
| FBG (mmol/L)                |          | 4.70 [4.30, 5.03]       | 0.177 | 4.80 [4.40, 5.21]       | 0.037  | 4.82 [4.41, 5.21]       | <0.001 | 4.78 [4.32, 5.20]       |
| ALT (U/L)                   |          | 14.00 [11.00, 23.85]    | 0.64  | 14.90 [11.00, 20.00]    | <0.001 | 15.00 [11.00, 22.00]    | <0.001 | 16.00 [11.70, 22.90]    |
| Creatinine (μmol/L)         |          | 60.00 [51.00, 65.65]    | 0.054 | 59.00 [51.00, 70.00]    | <0.001 | 59.00 [51.00, 69.30]    | <0.001 | 63.00 [53.00, 74.00]    |
| TSH (mIU/L)                 |          | 1.90 [1.26, 2.78]       | 0.099 | 1.81 [1.17, 2.65]       | <0.001 | 1.76 [1.14, 2.66]       | <0.001 | 1.61 [1.07, 2.34]       |

### History of diseases in female

|                                |     |            |        |             |        |             |        |              |
|--------------------------------|-----|------------|--------|-------------|--------|-------------|--------|--------------|
| Anemia                         | No  | 54 (98.2)  | 1      | 2787 (97.5) | 0.014  | 3292 (94.7) | <0.001 | 31355 (98.2) |
|                                | Yes | 1 (1.8)    |        | 72 (2.5)    |        | 183 (5.3)   |        | 590 (1.8)    |
| Thyroid disease                | No  | 54 (98.2)  | 0.943  | 2828 (98.9) | 0.009  | 3398 (97.8) | <0.001 | 31739 (99.4) |
|                                | Yes | 1 (1.8)    |        | 31 (1.1)    |        | 77 (2.2)    |        | 206 (0.6)    |
| History of premature birth     | No  | 55 (100.0) | 1      | 2847 (99.6) | 0.114  | 3462 (99.6) | 0.207  | 31867 (99.8) |
|                                | Yes | 0 (0.0)    |        | 12 (0.4)    |        | 13 (0.4)    |        | 78 (0.2)     |
| History of stillbirth          | No  | 55 (100.0) | 1      | 2814 (98.4) | <0.001 | 3425 (98.6) | <0.001 | 31693 (99.2) |
|                                | Yes | 0 (0.0)    |        | 45 (1.6)    |        | 50 (1.4)    |        | 252 (0.8)    |
| History of natural abortion    | No  | 52 (94.5)  | 0.766  | 2687 (94.0) | <0.001 | 3217 (92.6) | <0.001 | 30929 (96.8) |
|                                | Yes | 3 (5.5)    |        | 172 (6.0)   |        | 258 (7.4)   |        | 1016 (3.2)   |
| History of artificial abortion | 1   | 29 (52.7)  | <0.001 | 1859 (65.0) | <0.001 | 2466 (71.0) | <0.001 | 26664 (83.5) |
|                                | 2   | 18 (32.7)  |        | 626 (21.9)  |        | 680 (19.6)  |        | 3605 (11.3)  |
|                                | 3   | 8 (14.5)   |        | 374 (13.1)  |        | 329 (9.5)   |        | 1676 (5.2)   |

### Partner's characteristics

|                             |                                |                      |        |                      |        |                      |        |                      |
|-----------------------------|--------------------------------|----------------------|--------|----------------------|--------|----------------------|--------|----------------------|
| Age (year)                  |                                | 31.00 [28.50, 35.00] | 0.003  | 30.00 [27.00, 33.00] | <0.001 | 30.00 [27.00, 34.00] | <0.001 | 29.00 [26.00, 33.00] |
| Ethnicity                   | Han                            | 48 (87.3)            | 0.264  | 2606 (91.2)          | 0.013  | 3158 (90.9)          | 0.001  | 29537 (92.5)         |
|                             | Other                          | 7 (12.7)             |        | 253 (8.8)            |        | 317 (9.1)            |        | 2408 (7.5)           |
| Education level             | Junior high school and below   | 16 (29.1)            | 0.013  | 940 (32.9)           | <0.001 | 1036 (29.8)          | <0.001 | 15187 (47.5)         |
|                             | High school and junior college | 32 (58.2)            |        | 1635 (57.2)          |        | 2110 (60.7)          |        | 15185 (47.5)         |
|                             | Bachelor and above             | 7 (12.7)             |        | 284 (9.9)            |        | 329 (9.5)            |        | 1573 (4.9)           |
| Intensity of work           | Light                          | 20 (36.4)            | <0.001 | 771 (27.0)           | <0.001 | 956 (27.5)           | <0.001 | 4974 (15.6)          |
|                             | Moderate                       | 13 (23.6)            |        | 741 (25.9)           |        | 897 (25.8)           |        | 5454 (17.1)          |
|                             | Heavy                          | 22 (40.0)            |        | 1347 (47.1)          |        | 1622 (46.7)          |        | 21517 (67.4)         |
| Eat meat and eggs regularly | NO                             | 1 (1.8)              | 1      | 42 (1.5)             | 0.027  | 43 (1.2)             | 0.244  | 323 (1.0)            |
|                             | Yes                            | 54 (98.2)            |        | 2817 (98.5)          |        | 3432 (98.8)          |        | 31622 (99.0)         |
| Anorexia vegetables         | NO                             | 55 (100.0)           | 1      | 2835 (99.2)          | 0.085  | 3414 (98.2)          | <0.001 | 31765 (99.4)         |
|                             | Yes                            | 0 (0.0)              |        | 24 (0.8)             |        | 61 (1.8)             |        | 180 (0.6)            |
| Eat raw meat                | NO                             | 55 (100.0)           | 1      | 2816 (98.5)          | <0.001 | 3428 (98.6)          | <0.001 | 31734 (99.3)         |

|                           |          |                         |        |                         |        |                         |        |                         |
|---------------------------|----------|-------------------------|--------|-------------------------|--------|-------------------------|--------|-------------------------|
| Smoking                   | Yes      | 0 (0.0)                 |        | 43 (1.5)                |        | 47 (1.4)                |        | 211 (0.7)               |
|                           | NO       | 39 (70.9)               | 1      | 1778 (62.2)             | <0.001 | 2365 (68.1)             | <0.001 | 22878 (71.6)            |
| Passive smoking           | Yes      | 16 (29.1)               |        | 1081 (37.8)             |        | 1110 (31.9)             |        | 9067 (28.4)             |
|                           | No       | 33 (60.0)               | 0.182  | 1596 (55.8)             | <0.001 | 1858 (53.5)             | <0.001 | 23041 (72.1)            |
| Drinking                  | Yes      | 22 (40.0)               |        | 1263 (44.2)             |        | 1617 (46.5)             |        | 8904 (27.9)             |
|                           | No       | 28 (50.9)               | 0.027  | 1461 (51.1)             | <0.001 | 1777 (51.1)             | <0.001 | 22007 (68.9)            |
| Pressure of life and work | Yes      | 27 (49.1)               |        | 1398 (48.9)             |        | 1698 (48.9)             |        | 9938 (31.1)             |
|                           | Never    | 27 (49.1)               | <0.001 | 1661 (58.1)             | <0.001 | 1801 (51.8)             | <0.001 | 23371 (73.2)            |
|                           | Mild     | 7 (12.7)                |        | 426 (14.9)              |        | 527 (15.2)              |        | 4723 (14.8)             |
|                           | Moderate | 19 (34.5)               |        | 654 (22.9)              |        | 954 (27.5)              |        | 3370 (10.5)             |
|                           | Severe   | 2 (3.6)                 |        | 118 (4.1)               |        | 193 (5.6)               |        | 481 (1.5)               |
| BMI (Kg/m <sup>2</sup> )  |          | 22.12 [19.72, 24.22]    | 0.022  | 23.04 [20.90, 25.47]    | 0.084  | 22.04 [20.13, 24.22]    | <0.001 | 22.86 [21.00, 25.05]    |
| SBP (mmHg)                |          | 118.00 [110.00, 122.00] | 0.871  | 118.00 [110.00, 125.00] | <0.001 | 117.00 [110.00, 124.00] | 0.051  | 118.00 [110.00, 121.00] |
| DBP (mmHg)                |          | 74.00 [68.00, 80.00]    | 0.95   | 75.00 [70.00, 80.00]    | 0.006  | 75.00 [70.00, 80.00]    | 0.944  | 75.00 [70.00, 80.00]    |
| Blood group               | O        | 16 (29.1)               | 0.666  | 1020 (35.7)             | 0.039  | 1299 (37.4)             | <0.001 | 10861 (34.0)            |
|                           | A        | 20 (36.4)               |        | 859 (30.0)              |        | 991 (28.5)              |        | 9280 (29.0)             |
|                           | B        | 15 (27.3)               |        | 754 (26.4)              |        | 936 (26.9)              |        | 9003 (28.2)             |
|                           | AB       | 4 (7.3)                 |        | 226 (7.9)               |        | 249 (7.2)               |        | 2801 (8.8)              |
| Rh blood group            | Po       | 55 (100.0)              | 1      | 2857 (99.9)             | 0.025  | 3463 (99.7)             | 1      | 31839 (99.7)            |
|                           | Ne       | 0 (0.0)                 |        | 2 (0.1)                 |        | 12 (0.3)                |        | 106 (0.3)               |
| ALT (U/L)                 |          | 26.00 [18.70, 37.00]    | 0.761  | 27.00 [18.00, 39.95]    | <0.001 | 24.00 [16.00, 36.95]    | 0.008  | 25.00 [17.60, 36.00]    |
| Creatinine (μmol/L )      |          | 82.00 [71.00, 89.40]    | 0.489  | 81.50 [73.00, 91.50]    | 0.387  | 81.00 [72.00, 91.91]    | 0.771  | 81.00 [72.40, 91.00]    |
| <b>Outcomes</b>           |          |                         |        |                         |        |                         |        |                         |
| Gestational weeks         |          | 39.00 [38.00, 40.00]    | 0.56   | 39.00 [38.00, 40.00]    | <0.001 | 39.00 [38.00, 40.00]    | <0.001 | 39.00 [38.00, 40.00]    |
| Premature birth           | No       | 55 (100.0)              | 0.557  | 2795 (97.8)             | 0.298  | 3383 (97.4)             | 0.006  | 31326 (98.1)            |
|                           | Yes      | 0 (0.0)                 |        | 64 (2.2)                |        | 92 (2.6)                |        | 619 (1.9)               |
| LBW                       | No       | 55 (100.0)              | 0.677  | 2795 (97.8)             | 0.006  | 3411 (98.2)             | 0.198  | 31453 (98.5)            |
|                           | Yes      | 0 (0.0)                 |        | 64 (2.2)                |        | 64 (1.8)                |        | 492 (1.5)               |
| Stillbirth                | No       | 55 (100.0)              | 1      | 2852 (99.8)             | 0.306  | 3462 (99.6)             | 0.004  | 31898 (99.9)            |
|                           | Yes      | 0 (0.0)                 |        | 7 (0.2)                 |        | 13 (0.4)                |        | 47 (0.1)                |
| Birth gender              | Man      | 24 (43.6)               | 0.298  | 1489 (52.1)             | 0.546  | 1804 (51.9)             | 0.634  | 16443 (51.5)            |
|                           | Women    | 31 (56.4)               |        | 1370 (47.9)             |        | 1671 (48.1)             |        | 15502 (48.5)            |

|                  |                               |       |                               |       |                               |       |                               |
|------------------|-------------------------------|-------|-------------------------------|-------|-------------------------------|-------|-------------------------------|
| Birth weight (g) | 3250.00 [3000.00,<br>3500.00] | 0.472 | 3250.00 [3000.00,<br>3500.00] | 0.002 | 3250.00 [3000.00,<br>3500.00] | 0.002 | 3260.00 [3000.00,<br>3500.00] |
|------------------|-------------------------------|-------|-------------------------------|-------|-------------------------------|-------|-------------------------------|

b: *P* values for comparison between healthy women with TB partner and group healthy women with healthy partner;

c: *P* values for comparison between TB women with healthy partner and group healthy women with healthy partner;

a: *P* values for comparison between TB women with TB partner and group healthy women with healthy partner;

The distribution of continuous variables is expressed as the median [lower quartile, upper quartile]; BMI: body mass index; SBP: systolic blood pressure; DBP: diastolic blood pressure; FBG: fasting blood glucose; ALT: alanine aminotransferase; TSH: thyroid stimulating hormone; Ne: negative; Po: positive; LBW: low birth weight; TB: Tuberculosis
